# Supplementary material
Source: ML conference proceedings conference paper supplement (https://proceedings.neurips.cc/paper_files/paper/2017/hash/c930eecd01935feef55942cc445f708f-Abstract.html)
Supplement: Supplementary file [file c930eecd01935feef55942cc445f708f-Supplemental.zip]

# Supplementary Material for “Fitting Low-Rank Tensors in Constant Time”

## A Proof of Lemma 3.1

Before proving Lemma 3.1, we need to establish several definitions. We say that a partition  $\mathcal{Q}$  is a *refinement* of another partition  $\mathcal{P} = (V_1, \dots, V_p)$  if  $\mathcal{Q}$  is obtained by splitting each set  $V_i$  into one or more parts. The partition  $\mathcal{P} = (V_1, \dots, V_p)$  of the interval  $[0, 1]$  is called an *equipartition* if  $\lambda(V_i) = 1/p$  for every  $i \in [p]$ . For a dikernel  $\mathcal{W} : [0, 1]^K \rightarrow \mathbb{R}$  and an equipartition  $\mathcal{P} = (V_1, \dots, V_p)$  of  $[0, 1]$ , we define  $\mathcal{W}_{\mathcal{P}} : [0, 1]^K \rightarrow \mathbb{R}$  as the dikernel obtained by averaging each  $V_{i_1} \times \dots \times V_{i_K}$  for  $i_1, \dots, i_K \in [p]$ . More formally, we define

$$\mathcal{W}_{\mathcal{P}}(\mathbf{x}) = \frac{1}{\prod_{k \in [K]} \lambda(V_{i_k})} \int_{V_{i_1} \times \dots \times V_{i_K}} \mathcal{W}(\mathbf{x}') d\mathbf{x}' = p^K \int_{V_{i_1} \times \dots \times V_{i_K}} \mathcal{W}(\mathbf{x}') d\mathbf{x}',$$

where  $i_k$  is the unique index such that  $x_k \in V_{i_k}$  for each  $k \in [K]$ .

The following lemma states that any dikernel  $\mathcal{W} : [0, 1]^K \rightarrow \mathbb{R}$  can be well approximated by  $\mathcal{W}_{\mathcal{P}}$  for an equipartition  $\mathcal{P}$  into a small number of parts.

**Lemma A.1** (Weak regularity lemma for dikernels [9]). *Let  $\mathcal{P}$  be an equipartition of  $[0, 1]$  into  $p$  sets. Then, for any dikernel  $\mathcal{W} : [0, 1]^K \rightarrow \mathbb{R}$  and  $\epsilon > 0$ , there exists a refinement  $\mathcal{Q}$  of  $\mathcal{P}$  with  $|\mathcal{Q}| \leq p2^{O(1/\epsilon^{2K-2})}$  such that*

$$\|\mathcal{W} - \mathcal{W}_{\mathcal{Q}}\|_{\square} \leq \epsilon \|\mathcal{W}\|_F.$$

**Corollary A.2.** *Let  $\mathcal{W}^1, \dots, \mathcal{W}^T : [0, 1]^K \rightarrow \mathbb{R}$  be dikernels. Then, for any  $\epsilon > 0$ , there exists an equipartition  $\mathcal{P}$  into  $|\mathcal{P}| \leq 2^{O(T/\epsilon^{2K-2})}$  parts, such that for every  $t \in [T]$ ,*

$$\|\mathcal{W}^t - \mathcal{W}_{\mathcal{P}}^t\|_{\square} \leq \epsilon \|\mathcal{W}^t\|_F.$$

*Proof.* Let  $\mathcal{P}^0$  be a trivial partition, that is, a partition consisting of a single part  $[0, 1]$ . Then, for each  $t \in [T]$ , we iteratively apply Lemma A.1 with  $\mathcal{P}^{t-1}$ ,  $\mathcal{W}^t$ , and  $\epsilon$ , and we obtain the partition  $\mathcal{P}^t$  into at most  $|\mathcal{P}^{t-1}|2^{O(1/\epsilon^{2K-2})}$  parts such that  $\|\mathcal{W}^t - \mathcal{W}_{\mathcal{P}^t}^t\|_{\square} \leq \epsilon \|\mathcal{W}^t\|_2$ . Because  $\mathcal{P}^t$  is a refinement of  $\mathcal{P}^{t-1}$ , we have  $\|\mathcal{W}^i - \mathcal{W}_{\mathcal{P}^t}^i\|_{\square} \leq \|\mathcal{W}^i - \mathcal{W}_{\mathcal{P}^{t-1}}^i\|_{\square}$  for every  $i \in [t-1]$ . Then,  $\mathcal{P}^T$  satisfies the desired property with  $|\mathcal{P}^T| \leq (2^{O(1/\epsilon^{2K-2})})^T = 2^{O(T/\epsilon^{2K-2})}$ .  $\square$

Although the following lemma was originally proved for order-2 dikernels, the proof can easily be extended to general orders:

**Lemma A.3** ((4.15) of [5]). *Let  $\mathcal{W} : [0, 1]^K \rightarrow [-L, L]$  be a dikernel, and let  $S_1, \dots, S_K$  be sequences of  $s$  elements uniformly and independently sampled from  $[0, 1]$ . Then, we have*

$$-\frac{L}{s^{\Omega_K(1)}} \leq \mathbf{E}_{S_1, \dots, S_K} \|\mathcal{W}|_{S_1, \dots, S_K}\|_{\square} - \|\mathcal{W}\|_{\square} < \frac{L}{s^{\Omega_K(1)}},$$

where  $\Omega_K(1)$  hides a factor depending on  $K$ .

Finally, we need the following concentration inequality.

**Lemma A.4** (Azuma’s inequality). *Let  $(\Omega, A, P)$  be a probability space,  $k$  be a positive integer, and  $C > 0$ . Let  $\mathbf{z} = (z_1, \dots, z_k)$ , where  $z_1, \dots, z_k$  are independent random variables, and  $z_i$  takes values in some measure space  $(\Omega_i, A_i)$ . Let  $f : \Omega_1 \times \dots \times \Omega_k \rightarrow \mathbb{R}$  be a function. Suppose that  $|f(\mathbf{x}) - f(\mathbf{y})| \leq C$  whenever  $\mathbf{x}$  and  $\mathbf{y}$  only differ in one coordinate. Then*

$$\Pr \left[ |f(\mathbf{z}) - \mathbf{E}_{\mathbf{z}}[f(\mathbf{z})]| > \lambda C \right] < 2e^{-\lambda^2/2k}.$$

*Proof of Lemma 3.1.* We first bound the expectations and then prove their concentrations. We apply Corollary A.2 to  $\mathcal{W}^1, \dots, \mathcal{W}^T$  and  $\epsilon$ , and let  $\mathcal{P} = (V_1, \dots, V_p)$  be the obtained partition with  $p \leq 2^{T/\epsilon^{2K-2}}$  parts such that

$$\|\mathcal{W}^t - \mathcal{W}_{\mathcal{P}}^t\|_{\square} \leq \epsilon L.$$

for every  $t \in [T]$ . According to Lemma A.3, for every  $t \in [T]$ , we have

$$\mathbf{E}_{S_1, \dots, S_K} \|\mathcal{W}_{\mathcal{P}}^t|_{S_1, \dots, S_K} - \mathcal{W}^t|_{S_1, \dots, S_K}\|_{\square} = \mathbf{E}_{S_1, \dots, S_K} \|(\mathcal{W}_{\mathcal{P}}^t - \mathcal{W}^t)|_{S_1, \dots, S_K}\|_{\square} \leq \epsilon L + \frac{L}{s^{\Omega_K(1)}}.$$

Then, for any measure-preserving bijection  $\pi : [0, 1] \rightarrow [0, 1]$  and  $t \in [T]$ , we have

$$\mathbf{E}_{S_1, \dots, S_K} \|\mathcal{W}^t - \pi(\mathcal{W}^t|_{S_1, \dots, S_K})\|_{\square} \tag{4}$$

$$\begin{aligned} &\leq \|\mathcal{W}^t - \mathcal{W}_{\mathcal{P}}^t\|_{\square} + \mathbf{E}_{S_1, \dots, S_K} \|\mathcal{W}_{\mathcal{P}}^t - \pi(\mathcal{W}_{\mathcal{P}}^t|_{S_1, \dots, S_K})\|_{\square} + \mathbf{E}_{S_1, \dots, S_K} \|\pi(\mathcal{W}_{\mathcal{P}}^t|_{S_1, \dots, S_K}) - \pi(\mathcal{W}^t|_{S_1, \dots, S_K})\|_{\square} \\ &\leq 2\epsilon L + \frac{L}{s^{\Omega_K(1)}} + \mathbf{E}_{S_1, \dots, S_K} \|\mathcal{W}_{\mathcal{P}}^t - \pi(\mathcal{W}_{\mathcal{P}}^t|_{S_1, \dots, S_K})\|_{\square}. \end{aligned} \tag{5}$$

Thus, we are left with the problem of sampling from  $\mathcal{P}$ . For each  $k \in [K]$ , let  $Z_i^k$  be the number of points in  $S_k$  that fall into the set  $V_i$ . It is easy to compute the following:

$$\mathbf{E}[Z_i^k] = \frac{s}{p} \quad \text{and} \quad \mathbf{Var}[Z_i^k] = \left(\frac{1}{p} - \frac{1}{p^2}\right)s < \frac{s}{p}$$

for every  $k \in [K]$ . For each  $k \in [K]$ , the partition  $\mathcal{P}^k$  of  $[0, 1]$  into the sets  $V_1^k, \dots, V_p^k$  is constructed such that  $\lambda(V_i^k) = Z_i^k/s$  and  $\lambda(V_i \cap V_i^k) = \min(1/p, Z_i^k/s)$ . For each  $t \in [T]$ , we construct the dikernel  $\overline{\mathcal{W}}^t : [0, 1]^K \rightarrow \mathbb{R}$  such that the value of  $\overline{\mathcal{W}}^t$  on  $V_{i_1}^1 \times \dots \times V_{i_K}^K$  is the same as the value of  $\mathcal{W}_{\mathcal{P}}^t$  on  $V_{i_1}^1 \times \dots \times V_{i_K}^K$ . Then,  $\overline{\mathcal{W}}^t$  agrees with  $\mathcal{W}_{\mathcal{P}}^t$  on the set  $Q = \bigcup_{i_1, \dots, i_K \in [p]} (V_{i_1}^1 \cap V_{i_1}^1) \times \dots \times (V_{i_K}^K \cap V_{i_K}^K)$ . Then, there exists a bijection  $\pi$  such that  $\pi(\mathcal{W}_{\mathcal{P}}^t|_{S_1, \dots, S_K}) = \overline{\mathcal{W}}^t$  for each  $t \in [T]$ . Then, for every  $t \in [T]$ , we have

$$\begin{aligned} \|\mathcal{W}_{\mathcal{P}}^t - \pi(\mathcal{W}_{\mathcal{P}}^t|_{S_1, \dots, S_K})\|_{\square} &= \|\mathcal{W}_{\mathcal{P}}^t - \overline{\mathcal{W}}^t\|_{\square} \leq \int |\mathcal{W}_{\mathcal{P}}^t(\mathbf{x}) - \overline{\mathcal{W}}^t(\mathbf{x})| d\mathbf{x} \leq 2L(1 - \lambda(Q)) \\ &= 2L\left(1 - \prod_{k \in [K]} \sum_{i \in [p]} \min\left(\frac{1}{p}, \frac{Z_i^k}{s}\right)\right) = 2L\left(1 - \prod_{k \in [K]} \left(1 - \frac{1}{2} \sum_{i \in [p]} \left|\frac{1}{p} - \frac{Z_i^k}{s}\right|\right)\right) \\ &\leq 2L\left(1 - \prod_{k \in [K]} \left(1 - \frac{\sqrt{p}}{2} \sqrt{\sum_{i \in [p]} \left(\frac{1}{p} - \frac{Z_i^k}{s}\right)^2}\right)\right) \\ &\leq L\sqrt{p} \sum_{k \in [K]} \sqrt{\sum_{i \in [p]} \left(\frac{1}{p} - \frac{Z_i^k}{s}\right)^2}. \end{aligned}$$

Then, we have

$$\begin{aligned} \mathbf{E} \|\mathcal{W}_{\mathcal{P}}^t - \pi(\mathcal{W}_{\mathcal{P}}^t|_{S_1, \dots, S_K})\|_{\square} &= L\sqrt{p} \sum_{k \in [K]} \mathbf{E} \sqrt{\sum_{i \in [p]} \left(\frac{1}{p} - \frac{Z_i^k}{s}\right)^2} \leq L\sqrt{p} \sum_{k \in [K]} \sqrt{\mathbf{E} \sum_{i \in [p]} \left(\frac{1}{p} - \frac{Z_i^k}{s}\right)^2} \\ &\leq L\sqrt{p} \sum_{k \in [K]} \sqrt{\frac{1}{s^2} \sum_{i \in [p]} \mathbf{Var} Z_i^k} \leq L\sqrt{p} \sum_{k \in [K]} \sqrt{\frac{1}{ps}} = KL\sqrt{\frac{p}{s}}. \end{aligned}$$

Inserted this into (5), we obtain

$$\mathbf{E} \|\mathcal{W}^t - \pi(\mathcal{W}^t|_{S_1, \dots, S_K})\|_{\square} \leq 2\epsilon L + \frac{L}{s^{\Omega_K(1)}} + KL\sqrt{\frac{p}{s}} \leq 2\epsilon L + \frac{L}{s^{\Omega_K(1)}} + \frac{KL}{\sqrt{s}} 2^{O(T/\epsilon^{2K-2})}.$$

Choosing  $\epsilon = O(T/(\log_2 s^{\Omega_K(1)}))^{1/(2K-2)} = O_K(T/\log_2 s)^{1/(2K-2)}$ , we obtain the upper bound

$$\mathbf{E} \|\mathcal{W}^t - \pi(\mathcal{W}^t|_{S_1, \dots, S_K})\|_{\square} \leq 2L \cdot O_K\left(\frac{T}{\log_2 s}\right)^{1/(2K-2)} + \frac{L}{s^{\Omega_K(1)}} + \frac{KL}{s^{\Omega_K(1)}} = L \cdot O_K\left(\frac{T}{\log_2 s}\right)^{1/(2K-2)}.$$

Observing that  $\|\mathcal{W}^t - \pi(\mathcal{W}^t|_{S_1, \dots, S_K})\|_{\square}$  changes by at most  $O(L/s)$  if an element in one of  $S_1, \dots, S_K$  changes, we apply Azuma's inequality with  $\lambda = s \cdot \Omega_K(T/\log_2 s)^{1/(2K-2)}$  and the union bound to complete the proof.  $\square$

## B Proof of Lemma 3.2

We say that a vector-valued function  $f : [0, 1] \rightarrow \mathbb{R}^R$  is *orthonormal* if  $\langle f_r, f_r \rangle = 1$  for every  $r \in [R]$  and  $\langle f_r, f_{r'} \rangle = 0$  if  $r \neq r'$ . First, we calculate the partial derivatives of the objective function:

**Lemma B.1.** *Let  $\mathcal{X} \in [0, 1]^K \rightarrow \mathbb{R}$  be a dikernel,  $G \in \mathbb{R}^{R_1 \times \dots \times R_K}$  be a tensor, and  $\{f^{(k)} : [0, 1] \rightarrow \mathbb{R}^{R_k}\}_{k \in [K]}$  be a set of orthonormal vector-valued functions. Then, we have*

$$\begin{aligned} & \frac{\partial}{\partial f_{r_0}^{(k_0)}(x_0)} \left\| \mathcal{X} - [G; f^{(1)}, \dots, f^{(K)}] \right\|_F^2 \\ &= 2 \sum_{r_1, \dots, r_K : r_{k_0} = r_0} G_{r_1 \dots r_K} \int_{[0, 1]^K : x_{k_0} = x_0} \mathcal{X}(x) \prod_{k \in [K] \setminus \{k_0\}} f_{r_k}^{(k)}(x_k) dx \\ & \quad - 2 \sum_{r_1, \dots, r_K} G_{r_1 \dots r_K} G_{r_1 \dots r_{k_0-1} r_0 r_{k_0+1} \dots r_K} f_{r_{k_0}}^{(k_0)}(x_0). \end{aligned}$$

*Proof.*

$$\begin{aligned} & \frac{\partial}{\partial f_{r_0}^{(k_0)}(x_0)} \left\| \mathcal{X} - [G; f^{(1)}, \dots, f^{(K)}] \right\|_F^2 = \frac{\partial}{\partial f_{r_0}^{(k_0)}(x_0)} \int_{[0, 1]^K} \left( \mathcal{X}(x) - \sum_{r_1, \dots, r_K} G_{r_1 \dots r_K} \prod_{k \in [K]} f_{r_k}^{(k)}(x_k) \right)^2 dx \\ &= 2 \int_{[0, 1]^K : x_{k_0} = x_0} \left( \mathcal{X}(x) - \sum_{r_1, \dots, r_K} G_{r_1 \dots r_K} \prod_{k \in [K]} f_{r_k}^{(k)}(x_k) \right) \sum_{r'_1, \dots, r'_K : r'_{k_0} = r_0} G_{r'_1 \dots r'_K} \prod_{k \in [K] \setminus \{k_0\}} f_{r'_k}^{(k)}(x_k) dx \\ &= 2 \sum_{r_1, \dots, r_K : r_{k_0} = r_0} G_{r_1 \dots r_K} \int_{[0, 1]^K : x_{k_0} = x_0} \mathcal{X}(x) \prod_{k \in [K] \setminus \{k_0\}} f_{r_k}^{(k)}(x_k) dx \\ & \quad - 2 \sum_{r_1, \dots, r_K} G_{r_1 \dots r_K} \sum_{r'_1, \dots, r'_K : r'_{k_0} = r_0} G_{r'_1 \dots r'_K} f_{r_{k_0}}^{(k_0)}(x_0) \int_{[0, 1]^K : x_{k_0} = x_0} \prod_{k \in [K] \setminus \{k_0\}} f_{r_k}^{(k)}(x_k) \prod_{k \in [K] \setminus \{k_0\}} f_{r'_k}^{(k)}(x_k) dx \\ &= 2 \sum_{r_1, \dots, r_K : r_{k_0} = r_0} G_{r_1 \dots r_K} \int_{[0, 1]^K : x_{k_0} = x_0} \mathcal{X}(x) \prod_{k \in [K] \setminus \{k_0\}} f_{r_k}^{(k)}(x_k) dx \\ & \quad - 2 \sum_{r_1, \dots, r_K} G_{r_1 \dots r_K} \sum_{r'_1, \dots, r'_K : r'_{k_0} = r_0} G_{r'_1 \dots r'_K} f_{r_{k_0}}^{(k_0)}(x_0) \prod_{k \in [K] \setminus \{k_0\}} \int_{[0, 1]} f_{r_k}^{(k)}(x_k) f_{r'_k}^{(k)}(x_k) dx_k \\ &= 2 \sum_{r_1, \dots, r_K : r_{k_0} = r_0} G_{r_1 \dots r_K} \int_{[0, 1]^K : x_{k_0} = x_0} \mathcal{X}(x) \prod_{k \in [K] \setminus \{k_0\}} f_{r_k}^{(k)}(x_k) dx \\ & \quad - 2 \sum_{r_1, \dots, r_K} G_{r_1 \dots r_K} G_{r_1 \dots r_{k_0-1} r_0 r_{k_0+1} \dots r_K} f_{r_{k_0}}^{(k_0)}(x_0). \end{aligned}$$

which completes the proof.  $\square$

*Proof of Lemma 3.2.* First, we show that (LHS)  $\leq$  (RHS). Consider a sequence of solutions for the continuous problem (2) whose objective values attains the infimum. For Tucker decompositions, it is well known that there exists a minimizer for which the factor matrices  $U^{(1)}, \dots, U^{(K)}$  are orthonormal. By a similar reasoning, we can show that the vector-valued functions  $f^{(1)}, \dots, f^{(K)}$  in each solution of the sequence are orthonormal. As the objective function is coercive with respect

to the tensor  $G$ , we can take a subsequence for which  $G$  converges. Let  $G^*$  be the limit. Now, for any  $\delta > 0$ , we can create a matrix  $\tilde{G}$  by perturbing  $G^*$  so that (i) by fixing  $G$  to  $\tilde{G}$  in the continuous problem, the infimum increases only by  $\delta$ , and (ii) a matrix constructed from  $\tilde{G}$  is invertible (the detail is given later) and has a condition number at least  $\delta' = \delta'(\delta)$ .

Now, consider a sequence of solutions for the continuous problem (2) with  $G$  fixed to  $\tilde{G}$  whose objective values attains the infimum. We can show that the partial derivatives converges to zeros almost everywhere. Then, for any  $\epsilon > 0$ , there exists a solution  $(\tilde{G}, f^{(1)}, \dots, f^{(K)})$  in the sequence such that the partial derivatives are at most  $\epsilon$  almost everywhere.

Then by Lemma B.1, for any  $k_0 \in [K]$ ,  $r_0 \in [R_k]$ , and almost all  $x \in [0, 1]$ , we have

$$\begin{aligned} & \sum_{r_1, \dots, r_K} \tilde{G}_{r_1 \dots r_K} \tilde{G}_{r_1 \dots r_{k_0-1} r_0 r_{k_0+1} \dots r_K} f_{r_{k_0}}^{(k_0)}(x_0) \\ &= \sum_{r_1, \dots, r_K : r_{k_0} = r_0} \tilde{G}_{r_1 \dots r_K} \int_{[0,1]^K : x_{k_0} = x_0} \mathcal{X}(x) \prod_{k \in [K] \setminus \{k_0\}} f_{r_k}^{(k)}(x_k) dx \pm \epsilon(k_0, r_0, x), \end{aligned} \quad (6)$$

where  $\epsilon(k_0, r_0, x) = O(\epsilon)$ . Now, we consider a system of linear equations consisting of (7) for  $r_0 = 1, \dots, r_{k_0}$ . We assume that the matrix involved in this system is invertible and has a condition number at least  $\delta'$ . Then, for any  $k, r \in [R_k]$  and almost every pair  $x, x' \in [0, 1]$  with  $i_{N_k}(x) = i_{N_k}(x')$ , we have  $f_{r_0}^{(k_0)}(x) = f_{r_0}^{(k_0)}(x') \pm O(\epsilon/\delta')$ . For each  $k \in [K]$ , we can define a matrix  $U^{(k)} \in \mathbb{R}^{N_k \times R_k}$  as  $U_{ir}^{(k)} = f_r^{(k)}(x)$ , where  $x \in [0, 1]$  is an arbitrary value with  $i_{N_k}(x) = i$ . Then, we have

$$\begin{aligned} & \frac{1}{N} \left\| X - [\tilde{G}; U^{(1)}, \dots, U^{(K)}] \right\|_F^2 = \frac{1}{N} \sum_{i_1, \dots, i_K} \left( X_{i_1 \dots i_K} - [\tilde{G}; U^{(1)}, \dots, U^{(K)}]_{i_1 \dots i_K} \right)^2 \\ &= \sum_{i_1, \dots, i_K} \int_{I_{i_1}^{N_1} \times \dots \times I_{i_K}^{N_K}} \left( \mathcal{X}(x) - [\tilde{G}; f^{(1)}, \dots, f^{(K)}](x) \pm O(\epsilon/\delta') \right)^2 dx \\ &= \left\| \mathcal{X} - [\tilde{G}; f^{(1)}, \dots, f^{(K)}] \right\|_F^2 \pm O(\epsilon^2 N / (\delta')^2) \end{aligned}$$

for  $N = \prod_{k \in [K]} N_k$ . As the choice of  $\epsilon$  and  $\delta$  are arbitrary, we obtain (LHS)  $\leq$  (RHS).

Second, we show that (RHS)  $\leq$  (LHS). Let  $U^{(k)} \in \mathbb{R}^{N_k \times R_k}$  ( $k \in [K]$ ) be matrices. We define a vector-valued function  $f^{(k)} : [0, 1] \rightarrow \mathbb{R}^{R_k}$  as  $f_r^{(k)}(x) = U_{i_{N_k}(x)r}^{(k)}$  for each  $k \in [K]$  and  $r \in [R_k]$ . Then, we have

$$\begin{aligned} & \left\| \mathcal{X} - [G; f^{(1)}, \dots, f^{(K)}] \right\|_F^2 = \int_{[0,1]^K} \left( \mathcal{X}(x) - [G; f^{(1)}, \dots, f^{(K)}](x) \right)^2 dx \\ &= \sum_{i_1, \dots, i_K} \int_{\prod_{k \in [K]} I_{i_k}^{N_k}} \left( \mathcal{X}(x) - [G; f^{(1)}, \dots, f^{(K)}](x) \right)^2 dx \\ &= \frac{1}{N} \sum_{i_1, \dots, i_K} \left( X_{i_1 \dots i_K} - [G; U^{(1)}, \dots, U^{(K)}]_{i_1 \dots i_K} \right)^2 \\ &= \frac{1}{N} \left\| X - [G; U^{(1)}, \dots, U^{(K)}] \right\|_F^2. \quad \square \end{aligned}$$

### C Proof of Lemma 3.3

The cut norm is useful to bound the absolute value of the inner product between a tensor and a tensor product:

**Lemma C.1.** *Let  $\epsilon \geq 0$  and  $\mathcal{W} : [0, 1]^K \rightarrow \mathbb{R}$  be a dikernel with  $\|\mathcal{W}\|_{\square} \leq \epsilon$ . Then, for any functions  $f^{(1)}, \dots, f^{(K)} : [0, 1] \rightarrow [-L, L]$ , we have  $|\langle \mathcal{W}, \bigotimes_{k \in [K]} f^{(k)} \rangle| \leq \epsilon L^K$ .*

*Proof.* For  $\tau \in \mathbb{R}$  and the function  $h : [0, 1] \rightarrow \mathbb{R}$ , let  $L_\tau(h) := \{x \in [0, 1] \mid h(x) = \tau\}$  be the level set of  $h$  at  $\tau$ . For  $f^{(i)} = f^{(i)}/L$ , we have

$$\begin{aligned} |\langle \mathcal{W}, \bigotimes_{k \in [K]} f^{(k)} \rangle| &= L^K |\langle \mathcal{W}, \bigotimes_{k \in [K]} f^{(k)} \rangle| = L^K \left| \int_{[-1,1]^K} \prod_{k \in [K]} \tau_k \int_{\prod_{k \in [K]} L_{\tau_k}(f^{(k)})} \mathcal{W}(\mathbf{x}) d\mathbf{x} d\boldsymbol{\tau} \right| \\ &\leq L^K \int_{[-1,1]^K} \prod_{k \in [K]} |\tau_k| \left| \int_{\prod_{k \in [K]} L_{\tau_k}(f^{(k)})} \mathcal{W}(\mathbf{x}) d\mathbf{x} d\boldsymbol{\tau} \right| \leq \epsilon L^K \int_{[-1,1]^K} \prod_{k \in [K]} |\tau_k| d\boldsymbol{\tau} = \epsilon L^K. \quad \square \end{aligned}$$

Thus, we have the following:

**Lemma C.2.** Let  $\mathcal{X}, \mathcal{Y} : [0, 1]^K \rightarrow \mathbb{R}$  be kernels with  $\|\mathcal{X} - \mathcal{Y}\|_{\square} \leq \epsilon$  and  $\|\mathcal{X}^2 - \mathcal{Y}^2\|_{\square} \leq \epsilon$ , where  $\mathcal{X}^2(\mathbf{x}) = \mathcal{X}(\mathbf{x})^2$  and  $\mathcal{Y}^2(\mathbf{x}) = \mathcal{Y}(\mathbf{x})^2$  for every  $\mathbf{x} \in [0, 1]^K$ . Then, for any tensor  $G \in \mathbb{R}^{R_1 \times \dots \times R_K}$  and a set of vector-valued functions  $F = \{f^{(k)} : [0, 1] \rightarrow \mathbb{R}^{R_k}\}_{k \in [K]}$ , we have

$$\left\| \mathcal{X} - [G; f^{(1)}, \dots, f^{(K)}] \right\|_F^2 = \left\| \mathcal{Y} - [G; f^{(1)}, \dots, f^{(K)}] \right\|_F^2 \pm \epsilon \left( 1 + 2R \|G\|_{\max} \|F\|_{\max}^K \right),$$

where  $R = \prod_{k \in [K]} R_k$ .

*Proof.* We have

$$\begin{aligned} &\left| \left\| \mathcal{X} - [G; f^{(1)}, \dots, f^{(K)}] \right\|_F^2 - \left\| \mathcal{Y} - [G; f^{(1)}, \dots, f^{(K)}] \right\|_F^2 \right| \\ &= \left| \int_{[0,1]^K} \left( \mathcal{X}(\mathbf{x}) - [G; f^{(1)}, \dots, f^{(K)}](\mathbf{x}) \right)^2 d\mathbf{x} - \int_{[0,1]^K} \left( \mathcal{Y}(\mathbf{x}) - [G; f^{(1)}, \dots, f^{(K)}](\mathbf{x}) \right)^2 d\mathbf{x} \right| \\ &= \left| \int_{[0,1]^K} \left( \mathcal{X}(\mathbf{x})^2 - \mathcal{Y}(\mathbf{x})^2 \right) d\mathbf{x} - 2 \int_{[0,1]^K} (\mathcal{X}(\mathbf{x}) - \mathcal{Y}(\mathbf{x})) [G; f^{(1)}, \dots, f^{(K)}](\mathbf{x}) d\mathbf{x} \right| \\ &\leq \|\mathcal{X}^2 - \mathcal{Y}^2\|_{\square} + 2 \sum_{r_1 \in [R_1], \dots, r_K \in [R_K]} |G_{r_1 \dots r_K}| \cdot \left| \langle \mathcal{X} - \mathcal{Y}, \bigotimes_{k \in [K]} f_{r_k}^{(k)} \rangle \right| \\ &\leq \epsilon + 2\epsilon R \|G\|_{\max} \|F\|_{\max}^K \end{aligned}$$

by Lemma C.1. □

*Proof of Lemma 3.3.* By Lemma C.2, we have

$$\begin{aligned} \left\| \mathcal{Y} - [G_{\mathcal{Y}}; f_{\mathcal{Y}}^{(1)}, \dots, f_{\mathcal{Y}}^{(K)}] \right\|_F^2 &\leq \left\| \mathcal{Y} - [G_{\mathcal{X}}; f_{\mathcal{X}}^{(1)}, \dots, f_{\mathcal{X}}^{(K)}] \right\|_F^2 + \epsilon \\ &\leq \left\| \mathcal{X} - [G_{\mathcal{X}}; f_{\mathcal{X}}^{(1)}, \dots, f_{\mathcal{X}}^{(K)}] \right\|_F^2 + \left( 2\epsilon + 2\epsilon R \|G_{\mathcal{X}}\|_{\max} \|F_{\mathcal{X}}\|_{\max}^K \right). \end{aligned}$$

Similarly, we have

$$\begin{aligned} \left\| \mathcal{X} - [G_{\mathcal{X}}; f_{\mathcal{X}}^{(1)}, \dots, f_{\mathcal{X}}^{(K)}] \right\|_F^2 &\leq \left\| \mathcal{X} - [G_{\mathcal{Y}}; f_{\mathcal{Y}}^{(1)}, \dots, f_{\mathcal{Y}}^{(K)}] \right\|_F^2 + \epsilon \\ &\leq \left\| \mathcal{Y} - [G_{\mathcal{Y}}; f_{\mathcal{Y}}^{(1)}, \dots, f_{\mathcal{Y}}^{(K)}] \right\|_F^2 + \left( 2\epsilon + 2\epsilon R \|G_{\mathcal{Y}}\|_{\max} \|F_{\mathcal{Y}}\|_{\max}^K \right). \end{aligned}$$

Hence, the claim follows. □

## D Description of real datasets

**movie\_gray:** One of the movies contained in a human activity video dataset [14]. It consists of 107 frames at  $120 \times 160$  resolution. The original movie had RGB color information, but we reduce it to monochrome.

**EEM:** A collection of samples measured using fluorescence spectroscopy forming Excitation-Emission Matrices (EEMs)<sup>7</sup> [2].

<sup>7</sup><http://www.models.life.ku.dk/joda/prototype>

**fluorescence:** A collection of EEM measurements of human blood plasma samples<sup>8</sup> [11]. We used the variable `X_UD` in the dataset.

**bonnie:** HPLC-PDA profiles of 24 commercial preparations of St. John’s wort, originating from several continents<sup>9</sup> [1].

**fluor:** A fluorescence dataset<sup>10</sup>.

**wine:** 3-way data contained in the Wine GC-MS FT-IR dataset<sup>11</sup>.

**BCI\_Berlin:** Generated from electroencephalogram (EEG) data collected in Berlin<sup>12</sup> [4]. It records EEG signals with 59 channels for multiple trials and subjects. A signal is recorded each millisecond. From matlab files `BCICIV_calib_ds1a_1000Hz.mat`, `BCICIV_calib_ds1b_1000Hz.mat`, ..., `BCICIV_calib_ds1g_1000Hz.mat`, we extracted 4001 frames from each trial start-point and then concatenated them.

**visor:** Generated from video surveillance data<sup>13</sup> [19]. We extracted each frame of the video and converted it to a monochrome image. There were 16,818 frames at  $288 \times 384$  resolution.

---

<sup>8</sup><http://www.models.life.ku.dk/anders-cancer>

<sup>9</sup><http://www.models.life.ku.dk/Bonnie>

<sup>10</sup><http://www.models.life.ku.dk/Fluorescence>

<sup>11</sup>[http://www.models.life.ku.dk/Wine\\_GCMS\\_FTIR](http://www.models.life.ku.dk/Wine_GCMS_FTIR)

<sup>12</sup>[http://www.bbc.de/competition/iv/desc\\_1.html](http://www.bbc.de/competition/iv/desc_1.html)

<sup>13</sup>[http://www.openvisor.org/video\\_details.asp?idvideo=285](http://www.openvisor.org/video_details.asp?idvideo=285)
